# Supplementary material for: Potential of INSAT-3D Sounder Derived Total Precipitable Water Product for Weather Forecast
Source: Copernicus journal article supplement (doi:10.5194/amt-2018-8), 2018-02-27
Supplement: Supplementary file [file amt-2018-8-SC1-supplement.pdf]

The present program is basically shown the improvement notice after the GSICS corrections applied by Space Application Center, Indian Space Research Organization, Ahmedabad. In the abstract line 28 to 32 mentioned clearly that the corrections of GSICS have been applied at IMDPS, New Delhi for derivation of the products of INSAT-3D satellite and TPW is one such product. Therefore I am not satisfied with rejection in present form of manuscript, in fact this work should be encourage for better improvement.

However, INSAT-3D dataset was not initially GSICS corrected as in the case of current manuscript have shown.

1. IMD uses INSAT-3D sounder data particularly TPW, temperature and moisture profile issuance of nowcasting. Here no other dataset is readily available at the time of forecast. In this condition only INSAT-3D sounder TPW with higher temporal resolution of one hour is available to forecasters. The current TPW from INSAT-3D satellite can be utilized operationally for weather purpose and it can also offer substantial opportunities for improvement in now casting studies.
2. Basically for comparison of TPW and Rainfall by Wu. et. al., 2003. However, in our comparison we excluded all the cloudy part. We considered only available TPW as suggested by Wu. et. al., 2003.
3. The recent literature along with their details and results in form of referees will be added into the modified version of manuscript.
4. More number of case studies will be added into the modified version of manuscript.
5. The manuscript will be rephrase and English will be improve in modified version.
